# Supplementary material for: A biomimetic collagen–apatite scaffold with a multi-level lamellar structure for bone tissue engineering
Source: Royal Society of Chemistry journal article supplement (doi:10.1039/c3tb21595d), 2014-01-01
Supplement: c3tb21595d1.pdf [file c3tb21595d1.pdf]

## Supplementary Information

### A Biomimetic Collagen-Apatite Scaffold with a Multi-Level Lamellar Structure for Bone Tissue Engineering

Z. Xia, M. M. Villa and M. Wei

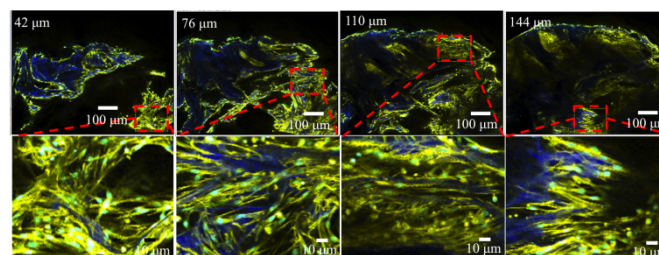

**Figure S1:** Two-photon z-stack through the Lamellar Scaffold after 4 days *in vitro*. As the scan moves toward central area of the scaffold from  $z = 42\mu\text{m}$  to  $z = 144\mu\text{m}$ , cells were observed inside the scaffolds and spreading throughout the scaffolds.

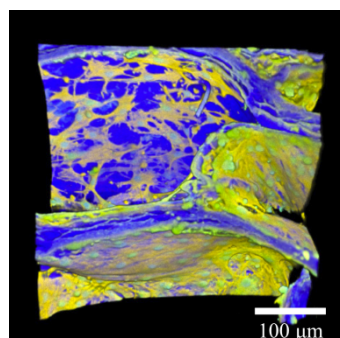

**Figure S2:** 3-D reconstruction of MC3T3-E1 cells on the Lamellar Scaffold after one day *in vitro*.
